# Supplementary material
Source: Springer Nature journal article supplement (https://www.springermedizin.de/resource/supplementary/12876_2011_656_MOESM2_ESM.pdf/9437188)

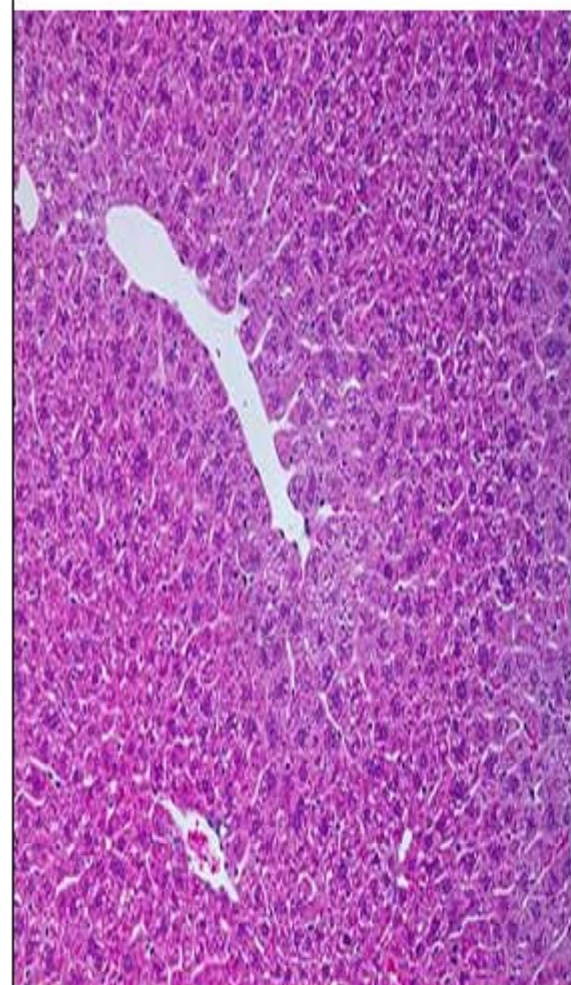

**Control x200**

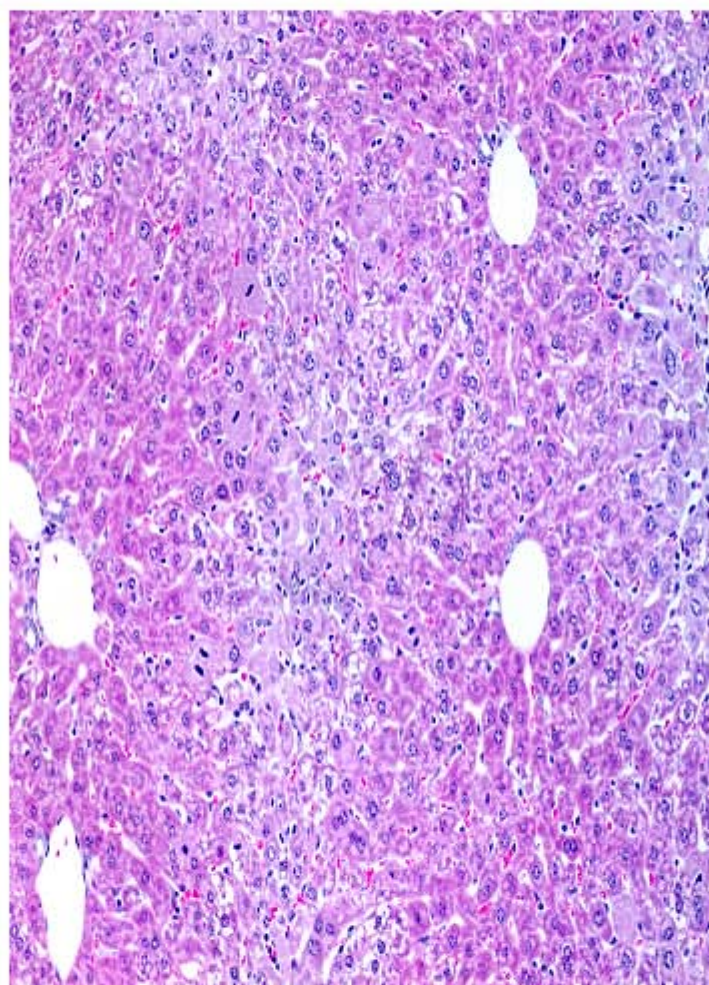

**Saline x200**

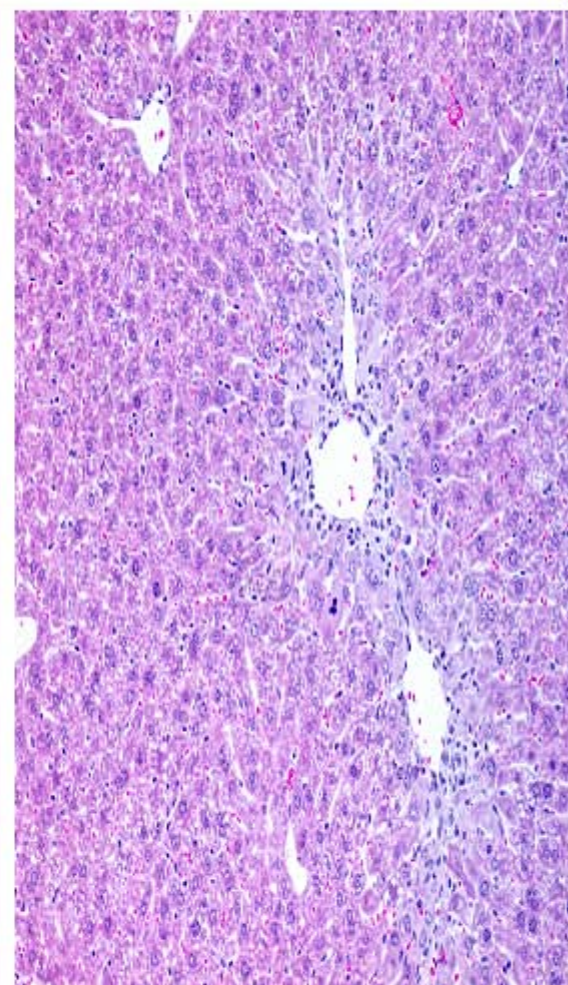

**RLS x200**

Supplement: MOESM2 [file 9437188]
